# Supplementary material
Source: PubMed Central journal article supplement (PMC5805610)
Supplement: NIHMS915432-supplement.pdf [file NIHMS915432-supplement.pdf]

## SUPPLEMENTAL INFORMATION

### Supplemental Figures

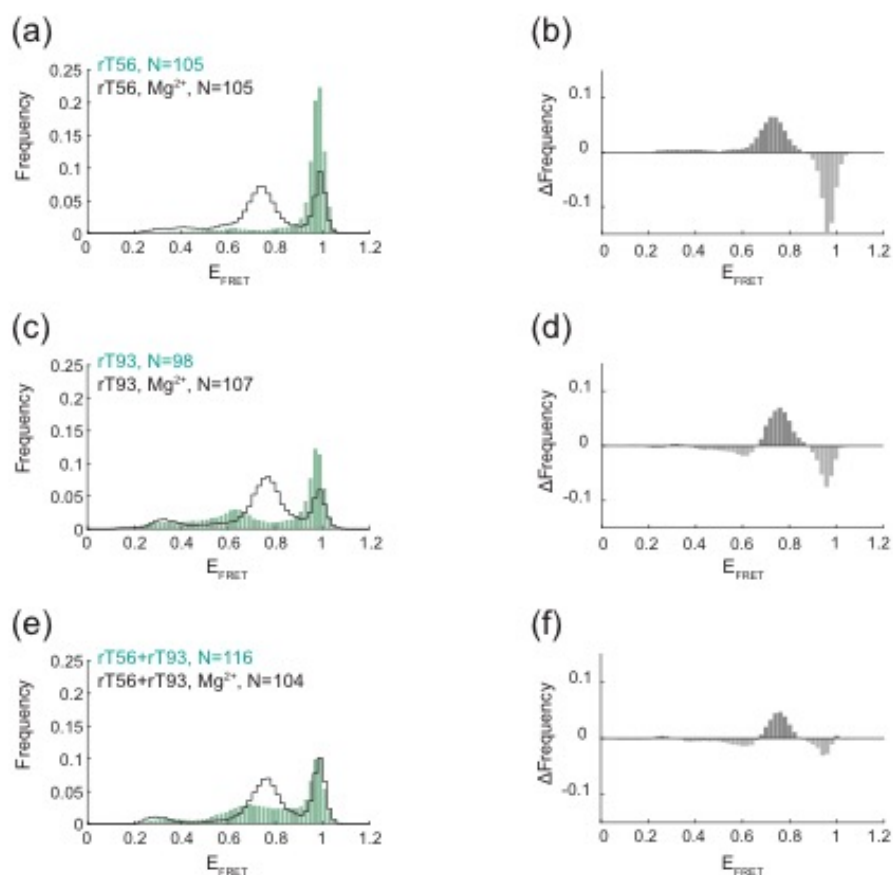

**Supplemental Figure 1.** Influence of rT incorporation on stem II structure and  $Mg^{2+}$ -dependent conformational switching. (a, c, e) Histograms of  $E_{FRET}$  values obtained from the indicated number ( $N$ ) of single molecules of rT-containing RNAs in the absence (filled, green bars) or presence of 10 mM  $Mg^{2+}$  (black lines). (b, d, f) Changes in  $E_{FRET}$  due to  $Mg^{2+}$  addition for each of the indicated RNAs. Each plot represents the result of subtraction of the histogram obtained in the absence of  $Mg^{2+}$  from the histogram obtained in the presence of  $Mg^{2+}$ .

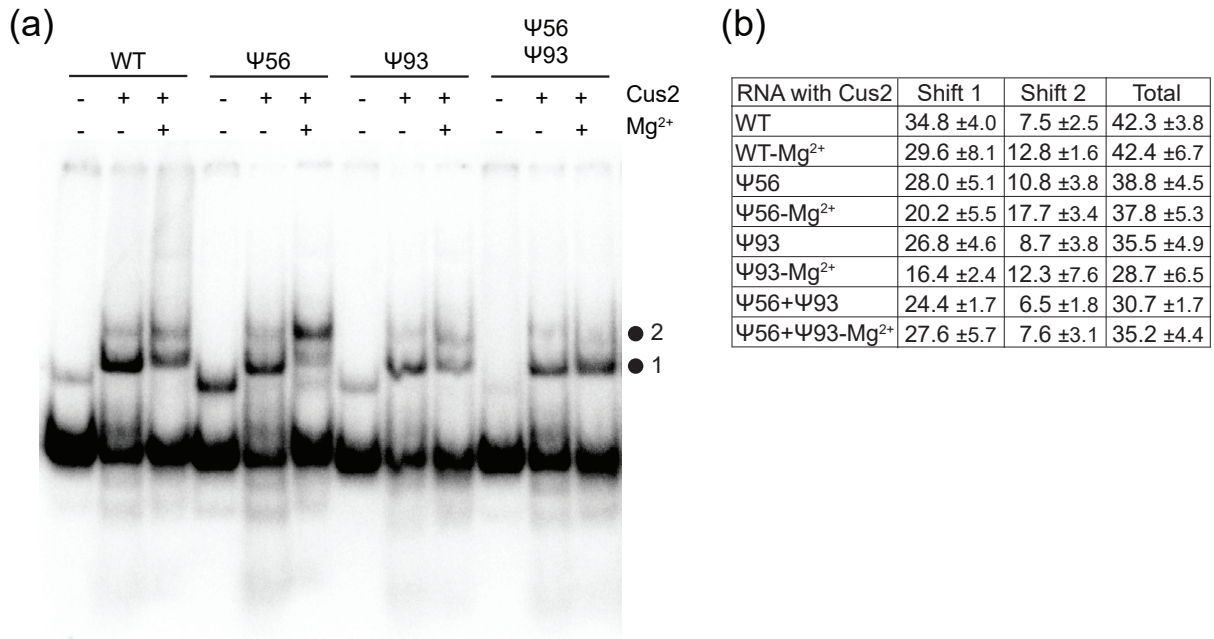

**Supplemental Figure 2.** EMSA analysis of Cus2 interaction with pseudouridine-containing stem II RNAs. (a) Representative EMSA results showing the migration of [<sup>32</sup>P]-labeled stem II RNAs (WT or containing the indicated pseudouridines) in the presence or absence of Cus2 (2 μM) or Mg<sup>2+</sup> (10 mM). The two Cus2-dependent band shifts are noted (shift 1 and 2). Note that each stem II RNA also migrates as a major and minor band in a non-denaturing gel, consistent with structural heterogeneity. (b) Quantification of EMSA results for each condition. Results reported are the average percent of shifted RNA from assays carried out in triplicate ±SD.

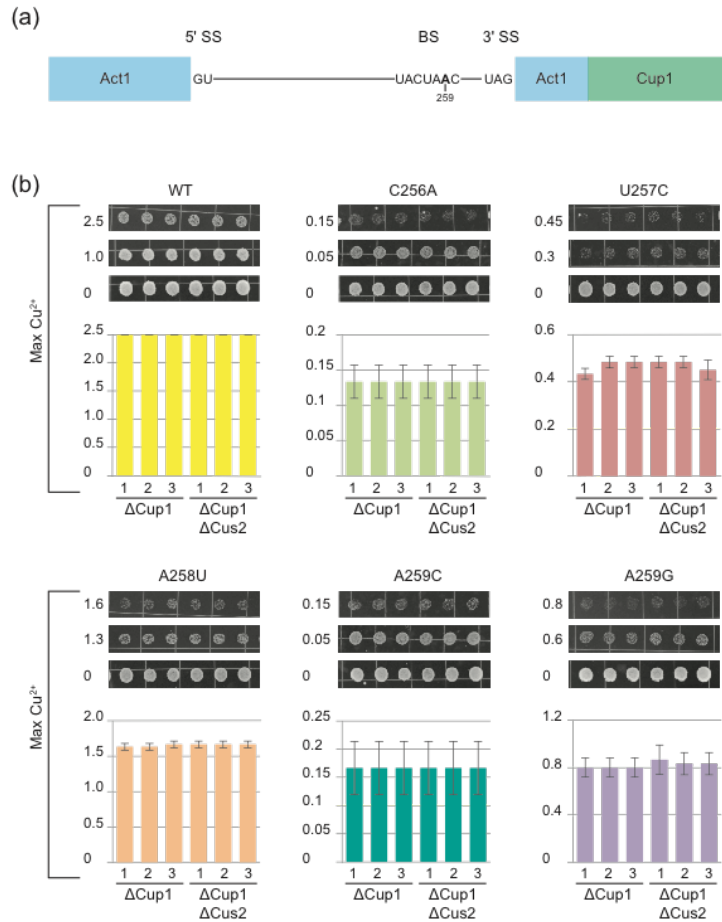

**Supplemental Figure 3.** ACT1-CUP1 assay for detecting changes in splicing of introns containing nonconsensus branchsites in the presence or absence of Cus2 and the snR81<sub>MUT</sub> snoRNA, which induces constitutive pseudouridylation at Ψ93. (a) Schematic of the ACT1-CUP1 reporter RNA. The branchpoint adenosine is noted (A259). (b) Results from ACT1-CUP1 assays using the noted WT or branchsite substitution reporters. All Cu<sup>2+</sup> concentrations are in mM. Representative images of yeast are shown at the indicated [Cu<sup>2+</sup>] and bar graphs represent the maximum [Cu<sup>2+</sup>] at which growth was observed. Bar height represents the average from three replicates, while error bars represent SD. In all cases “1” denotes a strain transformed with an empty vector control, “2” denotes a strain transformed with a plasmid encoding the expression of the WT snR81 snoRNA (snR81<sub>WT</sub>), and “3” denotes a strain transformed with a plasmid encoding expression of snR81<sub>MUT</sub>. No significant changes in Cu<sup>2+</sup> tolerance were observed due to the combination of the snR81<sub>MUT</sub> plasmid and Cus2Δ.

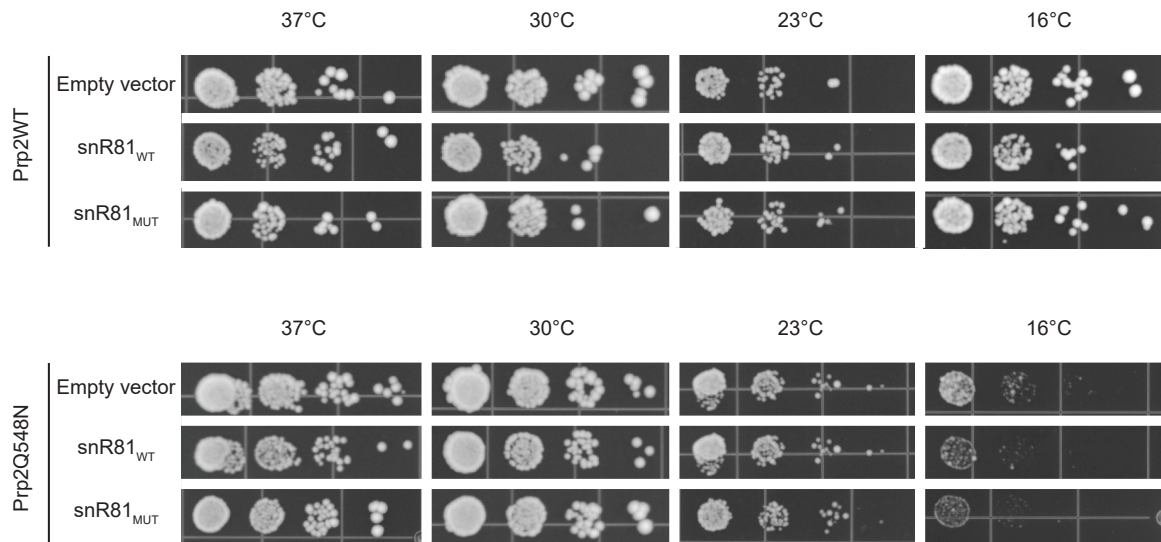

**Supplemental Figure 4.** Yeast growth assay for genetic interactions between a cold-sensitive allele of the Prp2 ATPase and the snR81<sub>MUT</sub> snoRNA, which induces constitutive pseudouridylation at Ψ93. Yeast containing combinations of Prp2 alleles and snR81 plasmids were spotted onto dropout (DO) plates and grown at the indicated temperatures. snR81<sub>MUT</sub> did not enhance or suppress the *cs* phenotype of the Prp2-Q548N allele or induce proliferative defects at other temperatures.

**Supplemental Table 1. RNA Oligonucleotides**

| Oligo name | Oligo Sequence (5' to 3')                                       | Notes                                                                                  |
|------------|-----------------------------------------------------------------|----------------------------------------------------------------------------------------|
| WT1-aa54   | AGUGUAGUAUCUGUUCUUUUCAG[aaU]GUAAC<br>AACUGAAAUGACCUCAAUG        | 5' portion of stem II, used for preparing WT or Ψ93 RNAs for smFRET                    |
| WT2-aa101  | AGGCUCAUUACCUUUUAAUUUG[aaU]UACAAU<br>ACACAUUUUUUGGCACCCA-Bio    | 3' portion of stem II, used for preparing WT or Ψ56 RNAs for smFRET                    |
| Ψ56-U54    | AGUGUAGUAUCUGUUCUUUUCAG[aaU]G[Ψ]AA<br>CAACUGAAAUGACCUCAAUG      | 5' portion of stem II, used for preparing Ψ56 or Ψ56+Ψ93-containing RNAs for smFRET    |
| Ψ93-U101   | AGGCUCAUUACCUU[Ψ]UAAUUUG[aaU]UACAA<br>UACACAUUUUUUGGCACCCA-Bio  | 3' portion of stem II, used for preparing Ψ93 or Ψ56+Ψ93-containing RNAs for smFRET    |
| rT56-U54   | AGUGUAGUAUCUGUUCUUUUCAG[aaU]G[rT]AA<br>CAACUGAAAUGACCUCAAUG     | 5' portion of stem II, used for preparing rT56 or rT56+rT93-containing RNAs for smFRET |
| rT93-U101  | AGGCUCAUUACCUU[rT]UAAUUUG[aaU]UACAA<br>UACACAUUUUUUGGCACCCA-Bio | 3' portion of stem II, used for preparing rT93 or rT56+rT93-containing RNAs for smFRET |
| WT1        | AGUGUAGUAUCUGUUCUUUUCAGUGUAACAA<br>CUGAAAUGACCUCAAUG            | 5' portion of stem II, used for preparing WT or Ψ93 RNAs for RNase T1 probing          |
| WT2        | AGGCUCAUUACCUUUUAAUUUGUUACAAUACA<br>CAUUUUUUUGGCACCCA           | 3' portion of stem II, used for preparing WT or Ψ56 RNAs for RNase T1 probing          |
| Ψ56        | AGUGUAGUAUCUGUUCUUUUCAGUG<br>[Ψ]AACAACUGAAAUGACCUCAAUG          | 5' portion of stem II, used for preparing Ψ56 or Ψ56+Ψ93 RNAs for RNase T1 probing     |
| Ψ93        | AGGCUCAUUACCUU[Ψ]UAAUUUGUUACAAUAC<br>ACAUUUUUUGGCACCCA          | 3' portion of stem II, used for preparing Ψ93 or Ψ56+Ψ93 RNAs for RNase T1 probing     |

Abbreviations: [aaU], aminoallyluridine; Bio, 3' biotin; Ψ, pseudouridine; rT, ribothymidine
